# Supplementary material
Source: Springer Nature journal article supplement (https://www.springermedizin.de/resource/supplementary/12943_2007_288_MOESM1_ESM.pdf/9553862)
Supplement: MOESM1 [file 9553862]

A.

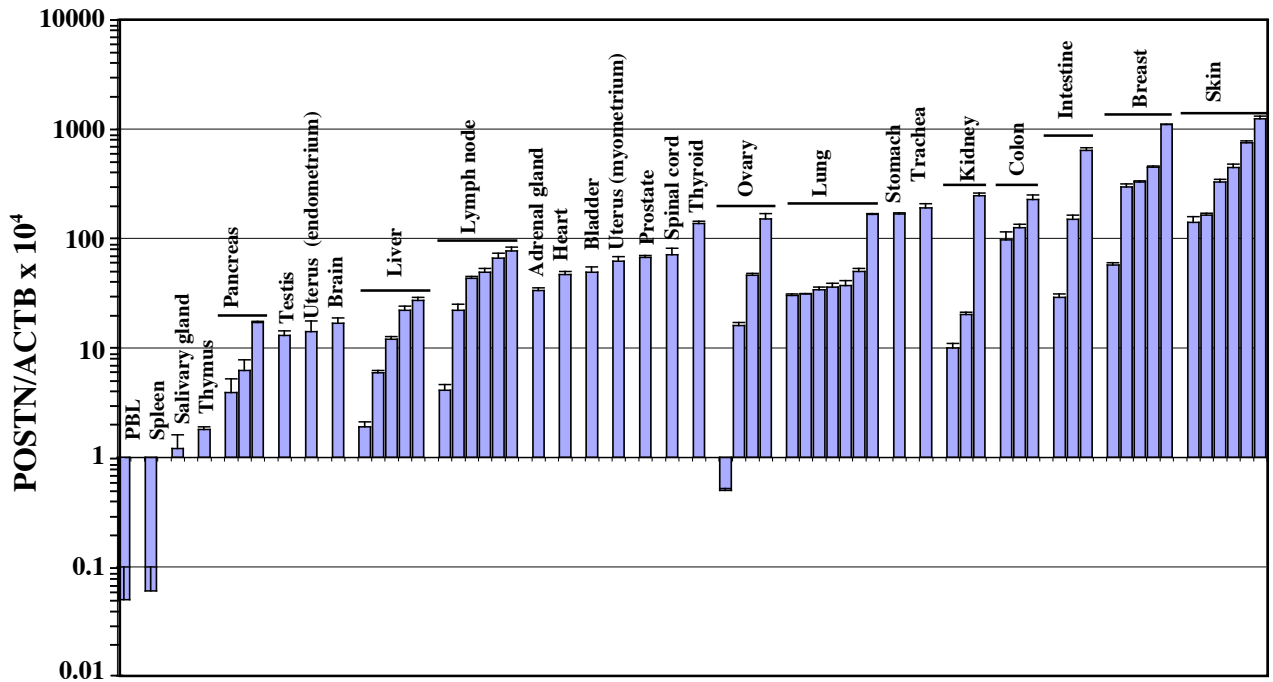

|                |                        |         |        |      |      |      |                 |                     |                    |                   |        |         |         |       |  |  |  |
|----------------|------------------------|---------|--------|------|------|------|-----------------|---------------------|--------------------|-------------------|--------|---------|---------|-------|--|--|--|
| PBL            | 0.05±0.05              |         |        |      |      |      | Uterus (myo)    | 62±6                |                    |                   |        |         |         |       |  |  |  |
| Spleen         | 0.06±0.04 <sup>1</sup> |         |        |      |      |      | Prostate        | 67±3                |                    |                   |        |         |         |       |  |  |  |
| Salivary gland | 1.2±0.4 <sup>2</sup>   |         |        |      |      |      | Spinal cord     | 71±10 <sup>4</sup>  |                    |                   |        |         |         |       |  |  |  |
| Thymus         | 1.8±0.1 <sup>3</sup>   |         |        |      |      |      | Thyroid         | 136±7               |                    |                   |        |         |         |       |  |  |  |
| Pancreas       | 3.9±1.3                | 6.2±1.6 | 17±0.4 |      |      |      | Ovary           | 0.5±0.02            | 16±1               | 46±2 <sup>5</sup> | 151±17 |         |         |       |  |  |  |
| Testis         | 13±1.3                 |         |        |      |      |      | Lung            | 30±1                | 31±0.3             | 34±2              | 36±3   | 37±4    | 50±3    | 165±3 |  |  |  |
| Uterus (endo)  | 14±3.6                 |         |        |      |      |      | Stomach         | 167±4               |                    |                   |        |         |         |       |  |  |  |
| Brain          | 17±2                   |         |        |      |      |      | Trachea         | 190±18 <sup>6</sup> |                    |                   |        |         |         |       |  |  |  |
| Liver          | 1.9±0.2                | 5.9±0.3 | 12±0.7 | 22±2 | 27±2 |      | Kidney          | 10±1                | 20±1               | 246±14            |        |         |         |       |  |  |  |
| Lymph node     | 4.1±0.5                | 22±3    | 43±2   | 49±4 | 66±7 | 77±6 | Colon           | 97±18               | 125±9 <sup>7</sup> | 226±23            |        |         |         |       |  |  |  |
| Surrenale      | 33±2                   |         |        |      |      |      | Small intestine | 29±2                | 149±14             | 634±41            |        |         |         |       |  |  |  |
| Heart          | 47±3                   |         |        |      |      |      | Breast          | 57±3                | 294±21             | 326±10            | 447±10 | 1094±14 |         |       |  |  |  |
| Bladder        | 49±6                   |         |        |      |      |      | Skin            | 140±18              | 162±7              | 326±19            | 444±32 | 748±26  | 1233±72 |       |  |  |  |

<sup>1</sup> pool of 6 tissues; <sup>2</sup> pool of 24; <sup>3</sup> pool of 9; <sup>4</sup> pool of 13; <sup>5</sup> pool of 4; <sup>6</sup> pool of 84; <sup>7</sup> pool of 2

B.

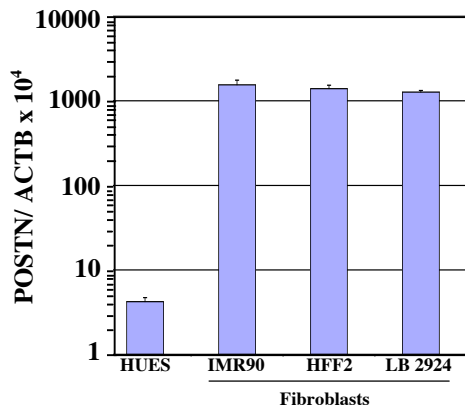

Fibroblasts
